# Supplementary material for: Improved Mechanical and Electrochemical Properties of XNBR Dielectric Elastomer Actuator by Poly(dopamine) Functionalized Graphene Nano-Sheets
Source: PubMed Central journal article supplement (PMC6419049; doi:10.3390/polym11020218), 2019-01-27
Supplement: polymers-11-00218-s001.pdf [file polymers-11-00218-s001.pdf]

## Supplementary Information

# Improved Mechanical and Electrochemical Properties of XNBR Dielectric Elastomer Actuator by Poly(dopamine) Functionalized Graphene Nano-Sheets

Dan Yang <sup>1,2,\*</sup>, Xinxin Kong <sup>1,2</sup>, Yufeng Ni <sup>1,2</sup>, Mengnan Ruan <sup>2,3</sup>, Shuo Huang <sup>1,2</sup>, Puzhen Shao <sup>1</sup>, Wenli Guo <sup>1,2</sup>, and Liqun Zhang <sup>3,\*</sup>

<sup>1</sup> Department of Material Science and Engineering, Beijing Institute of Petrochemical Technology, Beijing 102617, China

<sup>2</sup> Beijing Key Lab of Special Elastomeric Composite Materials, Beijing 102617, China

<sup>3</sup> Department of Materials Science and Engineering, Beijing University of Chemical Technology, Beijing 100029, China

\* Correspondence: yangdan@bipt.edu.cn (D.Y.); zhanglq@mail.buct.edu.cn (L.Z.)

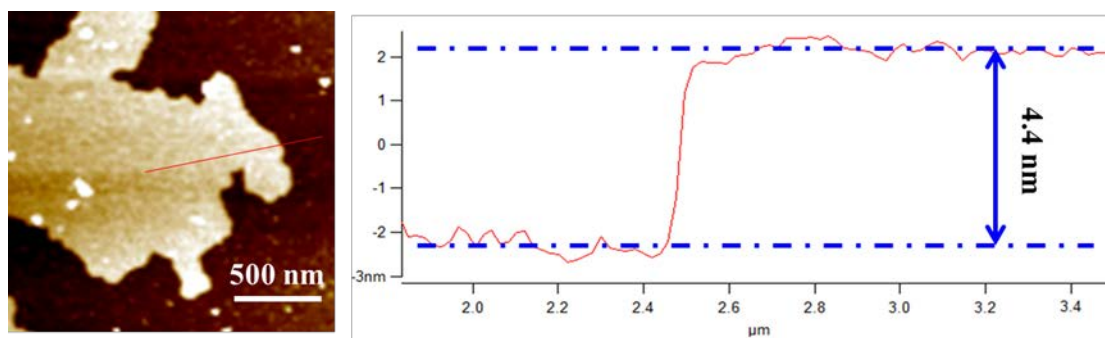

Figure S1. AFM height images of GNS.

The average thickness of GNS was determined by the MFP-3D Origin AFM (Oxford Instruments Co.; USA), which is shown in Figure S1. As shown in Figure S1, the average thickness of GNS is 4.4 nm.
